# Supplementary material for: Do people living with HIV experience greater age advancement than their HIV-negative counterparts?
Source: PubMed Central journal article supplement — AIDS. 2018 Oct 16;33(2):259–68. doi: 10.1097/QAD.0000000000002063 (PMC6319574; doi:10.1097/qad.0000000000002063), 2018-10-16
Supplement: aids-33-259-s001.pdf [file aids-33-259-s001.pdf]

## Supplementary material

**Supplementary table 1:** List of biomarkers used to determine biological age as part of the MARK-AGE algorithm

| <b>Biomarker</b>                                            | <b>Unit of measure</b> | <b>Sample material</b> | <b>Males/Females</b> |
|-------------------------------------------------------------|------------------------|------------------------|----------------------|
| Cumulative level of cytosine methylation at gene positions: |                        |                        |                      |
| ELOVL Fatty Acid Elongase 2 CpG 11,12,13,14                 | %                      | Blood cells            | Both                 |
| ELOVL Fatty Acid Elongase 2 CpG 15,16,17                    | %                      | Blood cells            | Both                 |
| FHL 2 CpG 11,12                                             | %                      | Blood cells            | Both                 |
| FHL 2 CpG 13,14,15                                          | %                      | Blood cells            | Both                 |
| FHL 2 CpG 16,17                                             | %                      | Blood cells            | Both                 |
| Dehydroepiandrosterone sulphate (DHEAS)                     | µmol/L                 | Plasma                 | Both                 |
| N-glycan peak 6                                             | RFU                    | Plasma                 | Both                 |
| Alpha-2 macroglobulin (A2M)                                 | mg/dL                  | Plasma                 | Only males           |
| Lycopene                                                    | µmol/L                 | Plasma                 | Only males           |
| Prostate specific antigen (PSA)                             | µg/L                   | Plasma                 | Only males           |
| Ferritin                                                    | µg/L                   | Plasma                 | Only females         |
| N-glycan log <sub>10</sub> (peak 1/peak 6)                  |                        | Plasma                 | Only females         |
| a-Tocopherol                                                | µmol/L                 | Plasma                 | Only females         |

RFU: Relative fluorescence units

**Supplementary table 2:** Number and proportion of HIV-positive COBRA participants currently or ever receiving each ARV drug with median (IQR) cumulative exposure (months)

| ARV drug                          | Currently receiving<br>n (%) | Ever received<br>n (%) | Cumulative exposure<br>[months]<br>Median (IQR) |
|-----------------------------------|------------------------------|------------------------|-------------------------------------------------|
| Abacavir                          | 18 (13.4%)                   | 52 (38.8%)             | 50.4 (22.5, 79.2)                               |
| Didanosine                        |                              | 43 (32.1%)             | 43.2 (13.9, 73.0)                               |
| Lamivudine                        | 31 (23.1%)                   | 99 (73.9%)             | 97.0 (42.5, 140.4)                              |
| Stavudine                         |                              | 49 (36.6%)             | 44.8 (22.3, 75.5)                               |
| Tenofovir                         | 97 (72.4%)                   | 123 (91.8%)            | 61.1 (36.9, 91.2)                               |
| Zalcitabine                       |                              | 13 (9.7%)              | 18.0 (9.7, 24.0)                                |
| Zidovudine                        |                              | 86 (64.2%)             | 44.3 (19.7, 89.8)                               |
| Emtricitabine                     | 85 (63.4%)                   | 103 (76.9%)            | 52.6 (34.2, 68.5)                               |
| Any d-drug                        |                              | 60 (44.8%)             | 62.4 (38.1, 100.0)                              |
| <b>NRTI Total</b>                 | <b>123 (91.8%)</b>           |                        | <b>138.1 (77.4, 186.7)</b>                      |
| Nevirapine                        | 31 (23.1%)                   | 62 (46.3%)             | 67.2 (21.6, 141.7)                              |
| Efavirenz                         | 30 (22.4%)                   | 64 (47.8%)             | 44.2 (10.4, 106.9)                              |
| <b>NNRTI Total</b>                | <b>70 (52.2%)</b>            |                        | <b>77.9 (25.4, 138.9)</b>                       |
| Darunavir                         | 32 (23.9%)                   | 43 (32.1%)             | 24.2 (4.4, 55.1)                                |
| Indinavir                         |                              | 34 (25.4%)             | 17.0 (11.4, 29.6)                               |
| Lopinavir                         |                              | 42 (31.3%)             | 37.1 (10.6, 98.0)                               |
| Boosting Ritonavir                | 66 (49.3%)                   | 81 (60.5%)             | 65.2 (18.3, 104.4)                              |
| Saquinavir                        |                              | 37 (27.6%)             | 22.1 (13.3, 43.7)                               |
| Saquinavir + d-drug               |                              | 26 (19.4%)             | 18.8 (13.8, 40.2)                               |
| Saquinavir + Ritonavir            |                              | 26 (19.4%)             | 23.6 (13.7, 62.0)                               |
| Saquinavir without Ritonavir      |                              | 27 (20.2%)             | 5.9 (0.1, 19.5)                                 |
| Saquinavir + Other PI             |                              | 5 (3.7%)               | 20.7 (12.1, 62.0)                               |
| Atazanavir                        | 26 (19.4%)                   | 47 (35.1%)             | 49.0 (11.7, 77.4)                               |
| Ritonavir                         |                              | 30 (22.4%)             | 16.9 (7.1, 30.4)                                |
| Nelfinavir                        |                              | 23 (17.2%)             | 26.0 (8.9, 34.2)                                |
| <b>PI Total</b>                   | <b>68 (50.8%)</b>            |                        | <b>65.7 (27.5, 120.2)</b>                       |
| Raltegravir                       | 7 (5.2%)                     | 15 (11.2%)             | 33.5 (16.5, 55.1)                               |
| <b>Integrase Inhibitors Total</b> | <b>7 (5.2%)</b>              |                        | <b>33.5 (16.5, 55.1)</b>                        |

Note: d-drugs are Didanosine, Stavudine and Zalcitabine

**Supplementary table 3:** Distribution of the ten individual biomarkers of aging in COBRA participants and BD ( $p^1$ : HIV-positive vs HIV-negative COBRA participants;  $p^2$ : HIV-positive COBRA participants vs BD;  $p^3$ : HIV-negative COBRA participants vs BD – all  $p$ 's were obtained from Wilcoxon signed-rank tests)

| Biomarker, median (IQR)                                     | COBRA participants   |                      | $p^1$  | BD (n=35)            | $p^2$  | $p^3$  |
|-------------------------------------------------------------|----------------------|----------------------|--------|----------------------|--------|--------|
|                                                             | HIV-positive (n=134) | HIV-negative (n=79)  |        |                      |        |        |
| Cumulative level of cytosine methylation at gene positions: |                      |                      |        |                      |        |        |
| ELOVL Fatty Acid Elongase 2 CpG 11,12,13,14 (%)             | 0.70 (0.67, 0.76)    | 0.67 (0.63, 0.71)    | <0.001 | 0.62 (0.56, 0.64)    | <0.001 | <0.001 |
| ELOVL Fatty Acid Elongase 2 CpG 15,16,17 (%)                | 0.63 (0.60, 0.68)    | 0.60 (0.57, 0.65)    | <0.001 | 0.58 (0.52, 0.62)    | <0.001 | 0.01   |
| FHL 2 CpG 11,12 (%)                                         | 0.22 (0.19, 0.26)    | 0.21 (0.17, 0.24)    | 0.01   | 0.17 (0.15, 0.20)    | <0.001 | 0.02   |
| FHL 2 CpG 13,14,15 (%)                                      | 0.35 (0.30, 0.39)    | 0.32 (0.28, 0.37)    | 0.008  | 0.26 (0.24, 0.31)    | <0.001 | <0.001 |
| FHL 2 CpG 16,17 (%)                                         | 0.54 (0.48, 0.59)    | 0.51 (0.46, 0.59)    | 0.26   | 0.42 (0.33, 0.50)    | <0.001 | <0.001 |
| DHEAS ( $\mu\text{mol/L}$ )                                 | 2.54 (1.35, 3.88)    | 3.21 (2.07, 4.40)    | 0.03   | 2.70 (1.81, 3.80)    | 0.63   | 0.15   |
| N-glycan peak 6 (RFU)                                       | 17.6 (16.0, 19.6)    | 18.0 (16.2, 20.2)    | 0.43   | 18.7 (17.5, 19.5)    | 0.04   | 0.18   |
| A2M (mg/dL) $\sigma$                                        | 150.4 (123.0, 204.5) | 134.6 (119.8, 154.5) | 0.004  | 96.7 (78.0, 128.0)   | <0.001 | <0.001 |
| Lycopene ( $\mu\text{mol/L}$ ) $\sigma$                     | 0.62 (0.39, 1.00)    | 0.78 (0.52, 1.14)    | 0.09   | 0.89 (0.46, 1.10)    | 0.19   | 0.73   |
| PSA ( $\mu\text{g/L}$ ) $\sigma$                            | 0.91 (0.57, 1.36)    | 1.05 (0.63, 2.35)    | 0.04   | 0.80 (0.37, 1.50)    | 0.63   | 0.14   |
| Ferritin ( $\mu\text{g/L}$ ) $\text{♀}$                     | 31.7 (10.2, 46.7)    | 58.5 (25.0, 172.3)   | 0.33   | 52.3 (24.2, 79.2)    | 0.40   | 0.79   |
| N-glycan $\log_{10}(\text{peak 1/peak 6})$ $\text{♀}$       | -0.22 (-0.37, -0.10) | -0.27 (-0.47, -0.10) | 0.60   | -0.38 (-0.50, -0.23) | 0.06   | 0.26   |
| a-Tocopherol ( $\mu\text{mol/L}$ ) $\text{♀}$               | 37.1 (24.7, 38.9)    | 35.0 (28.2, 43.4)    | 0.95   | 34.2 (28.0, 39.1)    | 0.92   | 0.70   |

Note:  $\sigma$ : only in male individuals (n=124 in COBRA HIV-positive, n=73 in COBRA HIV-negative and n=18 in BD);  $\text{♀}$ : only in female individuals (n=9 in COBRA HIV-positive, n=6 in COBRA HIV-negative and n=17 in BD)

**Supplementary table 4:** Mean (95% CI) increase (if positive) or decrease (if negative) in age advancement among HIV-positive COBRA participants associated with prior exposure (yes vs no) and years of cumulative exposure to each ARV drug. Estimates were obtained with separate linear regression models (one for each factor considered); models assessing the association with cumulative exposure were based only on HIV-positive COBRA participants who ever received that ARV drug (numbers shown in Supplementary table 2)

| Variable                                 | Mean (95% CI)<br>increase/decrease (in years) | p      |
|------------------------------------------|-----------------------------------------------|--------|
| Abacavir: prior exposure                 | 0.43 (-2.96, 3.81)                            | 0.80   |
| cumulative exposure (per year)           | -0.16 (-0.70, 0.37)                           | 0.55   |
| Didanosine: prior exposure               | 3.40 (-0.08, 6.89)                            | 0.06   |
| cumulative exposure (per year)           | 0.12 (-0.53, 0.78)                            | 0.71   |
| Lamivudine: prior exposure               | 2.75 (-0.98, 6.48)                            | 0.15   |
| cumulative exposure (per year)           | -0.05 (-0.35, 0.25)                           | 0.76   |
| Stavudine: prior exposure                | 4.14 (0.79, 7.49)                             | 0.02   |
| cumulative exposure (per year)           | 0.74 (0.15, 1.34)                             | 0.01   |
| Tenofovir: prior exposure                | 2.33 (-3.66, 8.33)                            | 0.44   |
| cumulative exposure (per year)           | 0.40 (-0.12, 0.92)                            | 0.13   |
| Zalcitabine: prior exposure              | 6.12 (0.65, 11.60)                            | 0.03   |
| cumulative exposure (per year)           | 0.34 (-1.65, 2.34)                            | 0.73   |
| Zidovudine: prior exposure               | 1.39 (-2.04, 4.82)                            | 0.42   |
| cumulative exposure (per year)           | -0.08 (-0.51, 0.35)                           | 0.71   |
| Emtricitabine: prior exposure            | 1.09 (-2.81, 5.00)                            | 0.58   |
| cumulative exposure (per year)           | 0.42 (-0.21, 1.06)                            | 0.19   |
| Any d-drug: prior exposure               | 3.57 (0.31, 6.83)                             | 0.03   |
| cumulative exposure (per year)           | 0.35 (-0.05, 0.76)                            | 0.09   |
| Nevirapine: prior exposure               | -0.93 (-4.23, 2.38)                           | 0.58   |
| cumulative exposure (per year)           | -0.16 (-0.49, 0.17)                           | 0.35   |
| Efavirenz: prior exposure                | 1.60 (-1.69, 4.89)                            | 0.34   |
| cumulative exposure (per year)           | 0.23 (-0.20, 0.66)                            | 0.29   |
| Darunavir: prior exposure                | 2.53 (-0.98, 6.03)                            | 0.16   |
| cumulative exposure (per year)           | 0.94 (0.04, 1.85)                             | 0.04   |
| Indinavir: prior exposure                | 1.41 (-2.37, 5.19)                            | 0.46   |
| cumulative exposure (per year)           | -0.03 (-1.43, 1.38)                           | 0.97   |
| Lopinavir: prior exposure                | 1.68 (-1.87, 5.22)                            | 0.35   |
| cumulative exposure (per year)           | 0.39 (-0.15, 0.92)                            | 0.15   |
| Boosting Ritonavir: prior exposure       | 2.85 (-0.49, 6.18)                            | 0.09   |
| cumulative exposure (per year)           | 0.40 (0.01, 0.80)                             | 0.05   |
| Saquinavir: prior exposure               | 4.89 (1.29, 8.48)                             | 0.008  |
| cumulative exposure (per year)           | 1.39 (0.71, 2.07)                             | <0.001 |
| Atazanavir: prior exposure               | -2.40 (-5.83, 1.04)                           | 0.17   |
| cumulative exposure (per year)           | -0.29 (-0.94, 0.36)                           | 0.38   |
| Ritonavir (non-boosting): prior exposure | 1.35 (-2.60, 5.30)                            | 0.50   |
| cumulative exposure (per year)           | 0.72 (-0.06, 1.51)                            | 0.07   |
| Nelfinavir: prior exposure               | 1.71 (-2.65, 6.08)                            | 0.44   |
| cumulative exposure (per year)           | 1.52 (-0.09, 3.13)                            | 0.06   |
| Raltegravir: prior exposure              | 1.59 (-3.63, 6.82)                            | 0.55   |
| cumulative exposure (per year)           | 0.64 (-0.70, 1.97)                            | 0.35   |

Note: d-drugs are Didanosine, Stavudine and Zalcitabine
